# Supplementary material for: Synthesis and Design of Hybrid Metalloporphyrin Polymers Based on Palladium (II) and Copper (II) Cations and Axial Complexes of Pyridyl-Substituted Sn(IV)Porphyrins with Octopamine
Source: MDPI journal article supplement (doi:10.3390/polym15041055), 2023-02-20
Supplement: s1 [file s1]

# Supplementary Information

of the article

Synthesis and design of hybrid metalloporphyrin polymers based on palladium (II) and copper (II) cations and axial complexes of pyridyl-substituted Sn(IV)porphyrins with octopamine

Anastasia E. Likhonina, Galina M. Mamardashvili, Ilya A. Khodov,  
Nugzar Z. Mamardashvili\*

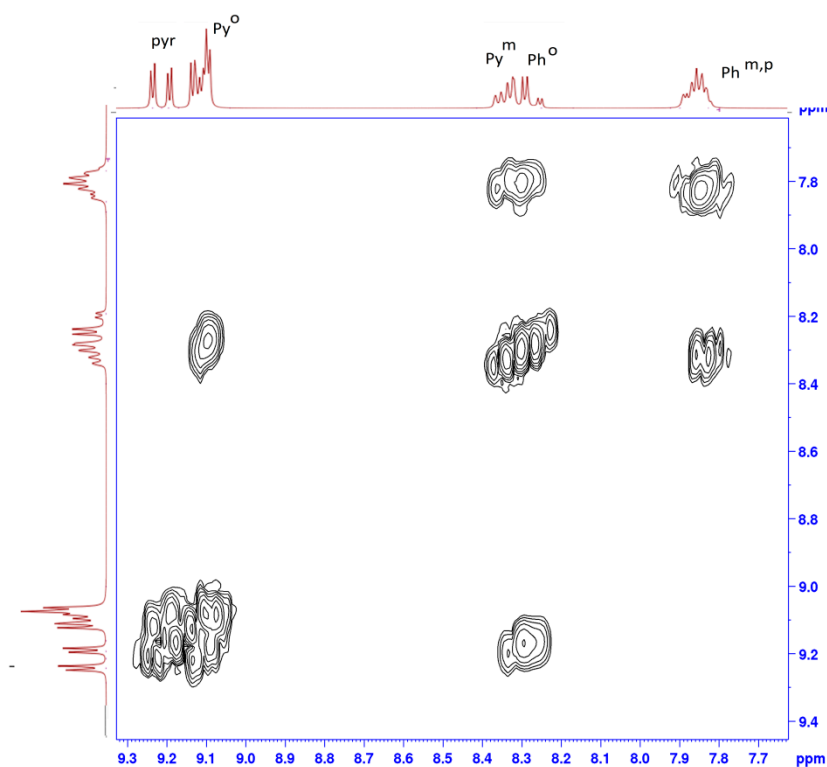

**Figure S1.** Partial  $^1\text{H}$ - $^1\text{H}$  COSY of the  $\text{Sn}(\text{OH})_2\text{P}$  in  $\text{DMSO}-d_6$

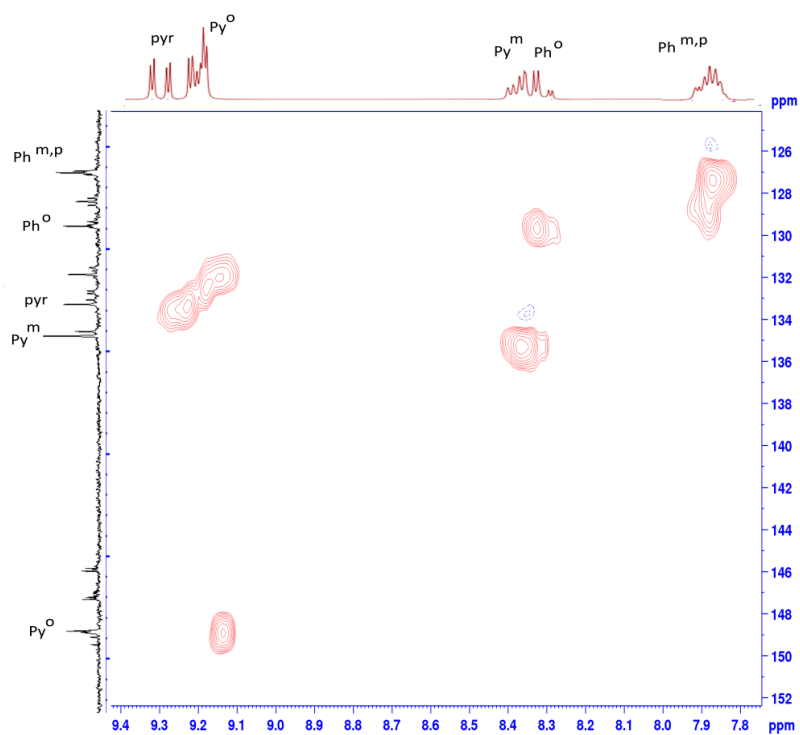

**Figure S2.** Partial  $^1\text{H}$ - $^{13}\text{C}$  HSQC of the  $\text{Sn}(\text{OH})_2\text{P}$  in  $\text{DMSO}-d_6$

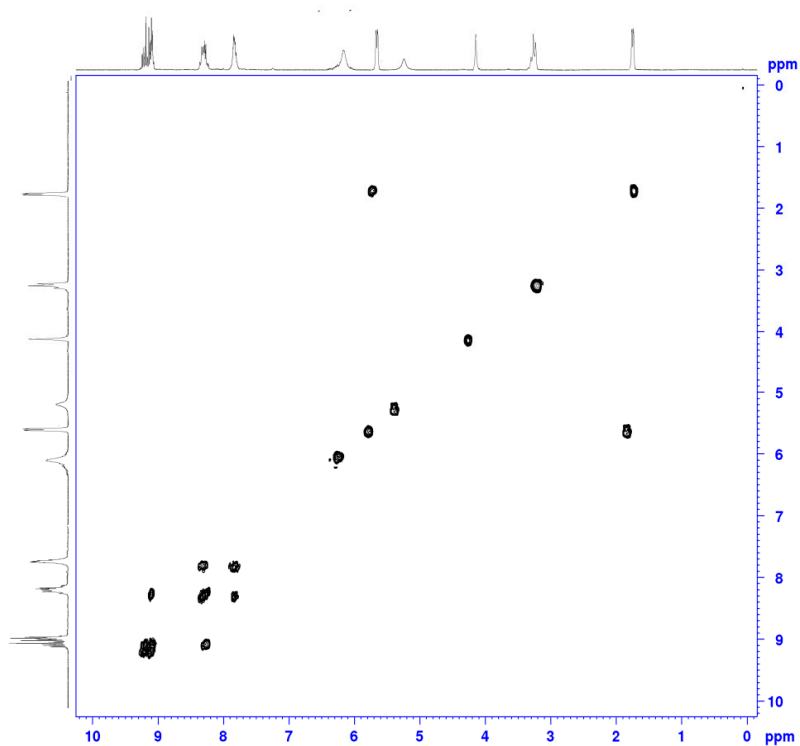

**Figure S3.**  $^1\text{H}$ - $^1\text{H}$  COSY of the  $\text{Sn}(\text{L})_2\text{P}$

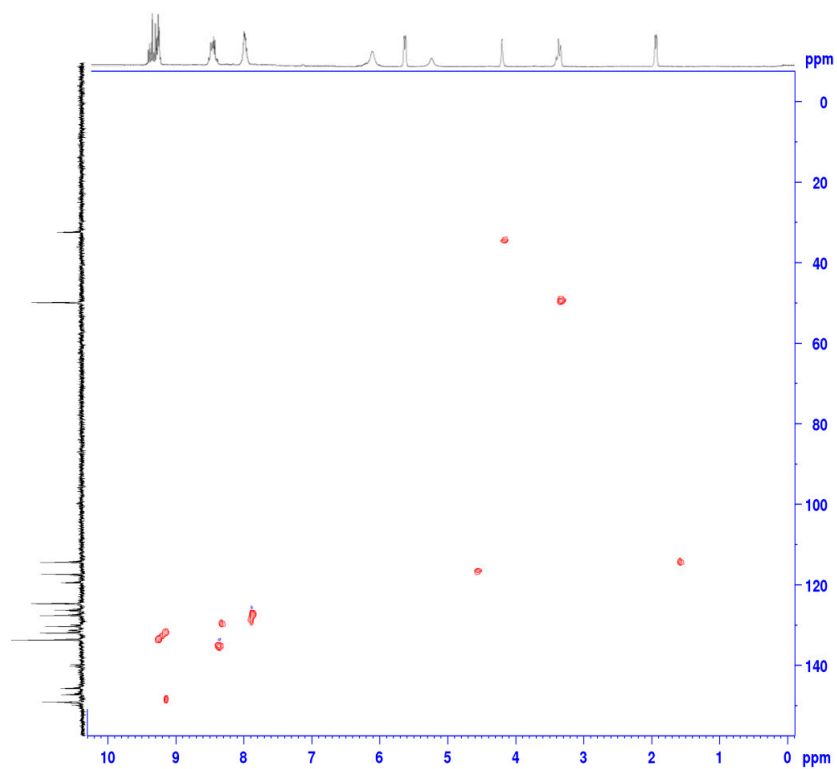

**Figure S4.**  $^1\text{H}$ - $^{13}\text{C}$  HSQC of the  $\text{Sn}(\text{L})_2\text{P}$

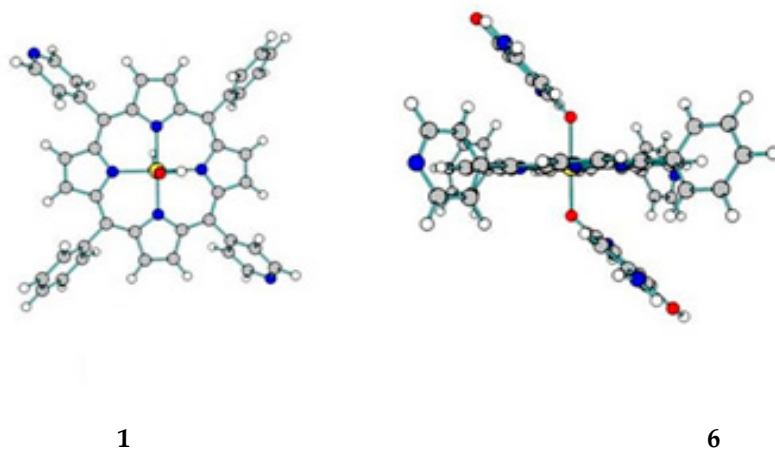

**Figure S5.** Optimized structures of the  $\text{Sn}(\text{OH})_2\text{P}$  **1** and  $\text{Sn}(\text{L})_2\text{P}$  **6** complexes.

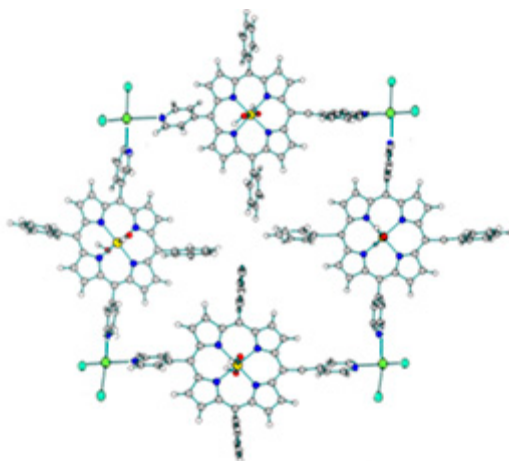

**Figure S6.** Cell structure of a 2D polymer - a cyclic tetramer complex  $(\text{Sn}(\text{OH})_2\text{P})_4(\text{PdCl}_2)_4$ , obtained by DFT with the B3LYP/3-21G kit.

**Table S1.** Barret-Joyner-Halenda (BJH) pore size distribution for compounds 2-4 (r is pore radius, V is pore volume, S is surface area).

| Name                           | Adsorption |                           |                          | Desorption |                           |                          |
|--------------------------------|------------|---------------------------|--------------------------|------------|---------------------------|--------------------------|
|                                | r, HM      | V, $\text{cm}^3/\text{g}$ | S, $\text{m}^2/\text{g}$ | r, HM      | V, $\text{cm}^3/\text{g}$ | S, $\text{m}^2/\text{g}$ |
| Sn(OH) <sub>2</sub> P <b>1</b> | -          | -                         | -                        | 1.531      | 0.024                     | 32                       |
|                                | 1.681      | 0.023                     | 28                       | 1.704      | 0.045                     | 56                       |
|                                | 1.881      | 0.047                     | 53                       | 1.905      | 0.069                     | 81                       |
|                                | 2.111      | 0.064                     | 69                       | 2.144      | 0.092                     | 102                      |
|                                | 2.386      | 0.088                     | 89                       | 2.433      | 0.115                     | 121                      |
|                                | 2.728      | 0.109                     | 105                      | 2.792      | 0.139                     | 139                      |
|                                | 3.163      | 0.128                     | 116                      | 3.237      | 0.159                     | 151                      |
|                                | 3.743      | 0.150                     | 128                      | 3.844      | 0.185                     | 164                      |
|                                | 4.559      | 0.173                     | 138                      | 4.703      | 0.207                     | 174                      |
|                                | 5.780      | 0.190                     | 144                      | 5.987      | 0.229                     | 181                      |
|                                | 7.899      | 0.211                     | 150                      | 8.145      | 0.255                     | 188                      |
|                                | 13.140     | 0.237                     | 153                      | 13.667     | 0.284                     | 192                      |
|                                | 52.879     | 0.269                     | 155                      | 53.283     | 0.306                     | 193                      |
| Sn(L) <sub>2</sub> P <b>6</b>  | -          | -                         | -                        | 1.53       | 0.033                     | 43                       |
|                                | 1.69       | 0.025                     | 30                       | 1.70       | 0.072                     | 89                       |
|                                | 1.88       | 0.079                     | 87                       | 1.90       | 0.112                     | 131                      |
|                                | 2.11       | 0.120                     | 126                      | 2.15       | 0.180                     | 195                      |
|                                | 2.39       | 0.173                     | 170                      | 2.44       | 0.191                     | 203                      |
|                                | 2.74       | 0.215                     | 201                      | 2.79       | 0.257                     | 251                      |
|                                | 3.17       | 0.227                     | 208                      | 3.24       | 0.293                     | 273                      |
|                                | 3.75       | 0.250                     | 221                      | 3.84       | 0.329                     | 292                      |
|                                | 4.57       | 0.284                     | 235                      | 4.67       | 0.354                     | 302                      |
|                                | 5.80       | 0.319                     | 248                      | 5.96       | 0.408                     | 321                      |

|                                                                                                      |        |       |       |        |       |      |
|------------------------------------------------------------------------------------------------------|--------|-------|-------|--------|-------|------|
|                                                                                                      | 7.91   | 0.336 | 252   | 8.30   | 0.442 | 329  |
|                                                                                                      | 12.67  | 0.372 | 258   | 13.67  | 0.479 | 334  |
|                                                                                                      | 43.54  | 0.378 | 258   | 44.25  | 0.482 | 334  |
| (Sn(L) <sub>2</sub> P) <sub>2</sub> Cu <b>7</b>                                                      | 1.68   | 0.028 | 34    | 1.70   | 0.033 | 39   |
|                                                                                                      | 1.88   | 0.061 | 68    | 1.91   | 0.074 | 82   |
|                                                                                                      | 2.11   | 0.100 | 105   | 2.15   | 0.105 | 110  |
|                                                                                                      | 2.39   | 0.126 | 127   | 2.43   | 0.146 | 145  |
|                                                                                                      | 2.74   | 0.149 | 144   | 2.79   | 0.180 | 168  |
|                                                                                                      | 3.18   | 0.191 | 171   | 3.25   | 0.207 | 185  |
|                                                                                                      | 3.76   | 0.214 | 183   | 3.85   | 0.234 | 200  |
|                                                                                                      | 4.55   | 0.235 | 192   | 4.70   | 0.272 | 215  |
|                                                                                                      | 5.77   | 0.260 | 200   | 5.98   | 0.299 | 225  |
|                                                                                                      | 7.87   | 0.297 | 210   | 8.31   | 0.330 | 232  |
|                                                                                                      | 12.70  | 0.316 | 213   | 13.91  | 0.366 | 237  |
|                                                                                                      | 43.67  | 0.353 | 215   | 44.55  | 0.391 | 238  |
| (Sn(OH) <sub>2</sub> P) <sub>4</sub> (PdCl <sub>2</sub> ) <sub>4</sub><br><b>2</b>                   | 1.694  | 0.501 | 592   | 1.698  | 0.594 | 700  |
|                                                                                                      | 1.889  | 1.002 | 1122  | 1.899  | 1.019 | 1147 |
|                                                                                                      | 2.120  | 1.623 | 1.708 | 2.134  | 1.657 | 1745 |
|                                                                                                      | 2.409  | 2.075 | 2083  | 2.419  | 2.189 | 2185 |
|                                                                                                      | 2.759  | 2.416 | 2330  | 2.771  | 2.679 | 2539 |
|                                                                                                      | 3.184  | 2.972 | 2680  | 3.201  | 3.246 | 2893 |
|                                                                                                      | 3.767  | 3.343 | 2877  | 3.819  | 3.684 | 3122 |
|                                                                                                      | 4.588  | 3.888 | 3114  | 4.654  | 4.198 | 3344 |
|                                                                                                      | 5.849  | 4.255 | 3240  | 5.908  | 4.752 | 3531 |
|                                                                                                      | 8.034  | 4.703 | 3351  | 8.322  | 5.127 | 3621 |
|                                                                                                      | 13.204 | 5.071 | 3407  | 13.503 | 5.573 | 3687 |
|                                                                                                      | 51.174 | 5.415 | 3420  | 51.224 | 5.890 | 3700 |
| (Sn(L) <sub>2</sub> P) <sub>4</sub> (PdCl <sub>2</sub> ) <sub>4</sub><br><b>3</b>                    | 1.687  | 0.310 | 368   | 1.702  | 0.463 | 544  |
|                                                                                                      | 1.891  | 0.688 | 768   | 1.897  | 0.825 | 925  |
|                                                                                                      | 2.122  | 1.005 | 1066  | 2.124  | 1.294 | 1368 |
|                                                                                                      | 2.408  | 1.283 | 1297  | 2.412  | 1.647 | 1660 |
|                                                                                                      | 2.763  | 1.655 | 1566  | 2.755  | 2.083 | 1976 |
|                                                                                                      | 3.202  | 1.929 | 1737  | 3.202  | 2.458 | 2211 |
|                                                                                                      | 3.789  | 2.192 | 1876  | 3.828  | 2.905 | 2445 |
|                                                                                                      | 4.623  | 2.511 | 2014  | 4.645  | 3.279 | 2606 |
|                                                                                                      | 5.861  | 2.857 | 2132  | 5.914  | 3.607 | 2716 |
|                                                                                                      | 7.998  | 3.130 | 2201  | 8.209  | 4.010 | 2814 |
|                                                                                                      | 13.088 | 3.327 | 2231  | 13.386 | 4.270 | 2853 |
|                                                                                                      | 53.217 | 3.593 | 2241  | 53.366 | 4.588 | 2865 |
| ((Sn(L-Cu) <sub>2</sub> P) <sub>4</sub> (PdCl <sub>2</sub> ) <sub>4</sub> ) <sub>n</sub><br><b>4</b> | 1.697  | 0.016 | 18.5  | 1.697  | 0.043 | 50.8 |
|                                                                                                      | 1.899  | 0.039 | 42.7  | 1.901  | 0.087 | 96.6 |
|                                                                                                      | 2.132  | 0.053 | 56.0  | 2.133  | 0.124 | 132  |
|                                                                                                      | 2.414  | 0.081 | 79.5  | 2.408  | 0.168 | 168  |
|                                                                                                      | 2.770  | 0.118 | 106.2 | 2.745  | 0.208 | 197  |

|  |        |       |       |        |       |     |
|--|--------|-------|-------|--------|-------|-----|
|  | 3.225  | 0.129 | 113.2 | 3.193  | 0.515 | 225 |
|  | 3.812  | 0.172 | 135.9 | 3.813  | 0.288 | 244 |
|  | 4.610  | 0.181 | 139.7 | 4.645  | 0.330 | 262 |
|  | 5.885  | 0.204 | 147.4 | 5.978  | 0.350 | 269 |
|  | 8.112  | 0.211 | 149.1 | 8.261  | 0.370 | 273 |
|  | 12.151 | 0.222 | 150.7 | 13.752 | 0.406 | 279 |
|  | 51.219 | 0.230 | 151.0 | 51.750 | 0.427 | 279 |
